# Supplementary material for: Bulk photovoltaic effect in a two-dimensional ferroelectric semiconductor α-In 2 Se 3
Source: Royal Society of Chemistry journal article supplement (doi:10.1039/d4nr05317f), 2025-01-01
Supplement: d4nr05317f1.pdf [file d4nr05317f1.pdf]

Supporting Information

## **Bulk photovoltaic effect in two-dimensional ferroelectric semiconductor $\alpha$ -In<sub>2</sub>Se<sub>3</sub>**

Xiaojuan Chen<sup>1#,\*</sup>, Kang Xu<sup>2#</sup>, Tingxiao Qin<sup>1</sup>, Yubin Wang<sup>2</sup>, Qihua Xiong<sup>1,2,3,4</sup>,  
and Haiyun Liu<sup>1\*</sup>

1 Beijing Academy of Quantum Information Sciences, Beijing 100193, P.R. China;

2 State Key Laboratory of Low-Dimensional Quantum Physics and Department of  
Physics, Tsinghua University, Beijing 100084, P.R. China;

3 Frontier Science Center for Quantum Information, Beijing 100084, P. R. China;

4 Collaborative Innovation Center of Quantum Matter, Beijing 100084, P.R. China.

*#These authors contributed equally to this work.*

*\*To whom correspondence should be addressed.*

*Emails: X. J.: [xjchen@baqis.ac.cn](mailto:xjchen@baqis.ac.cn) and H.Y.: [liuhy@baqis.ac.cn](mailto:liuhy@baqis.ac.cn)*

**Section 1: Ferroelectricity of 3R  $\alpha$ -In<sub>2</sub>Se<sub>3</sub> flakes**

**Section 2: Characterization of thin graphite/ $\alpha$ -In<sub>2</sub>Se<sub>3</sub>/thin graphite device**

**Section 3: Electrical transport research of thin graphite/ $\alpha$ -In<sub>2</sub>Se<sub>3</sub>/thin graphite  
device**

**Section 4: Optical characterization of  $\alpha$ -In<sub>2</sub>Se<sub>3</sub> flake**

**Section 5: Temperature dependence of  $I_{sc}$  and  $V_{oc}$  for 2D  $\alpha$ -In<sub>2</sub>Se<sub>3</sub> BPV device and  
its circuit Model**

**Section 6: 2D  $\alpha$ -In<sub>2</sub>Se<sub>3</sub> BPV device under different light excitations**

## Section 1: Ferroelectricity of the 3R $\alpha$ - $\text{In}_2\text{Se}_3$ flake

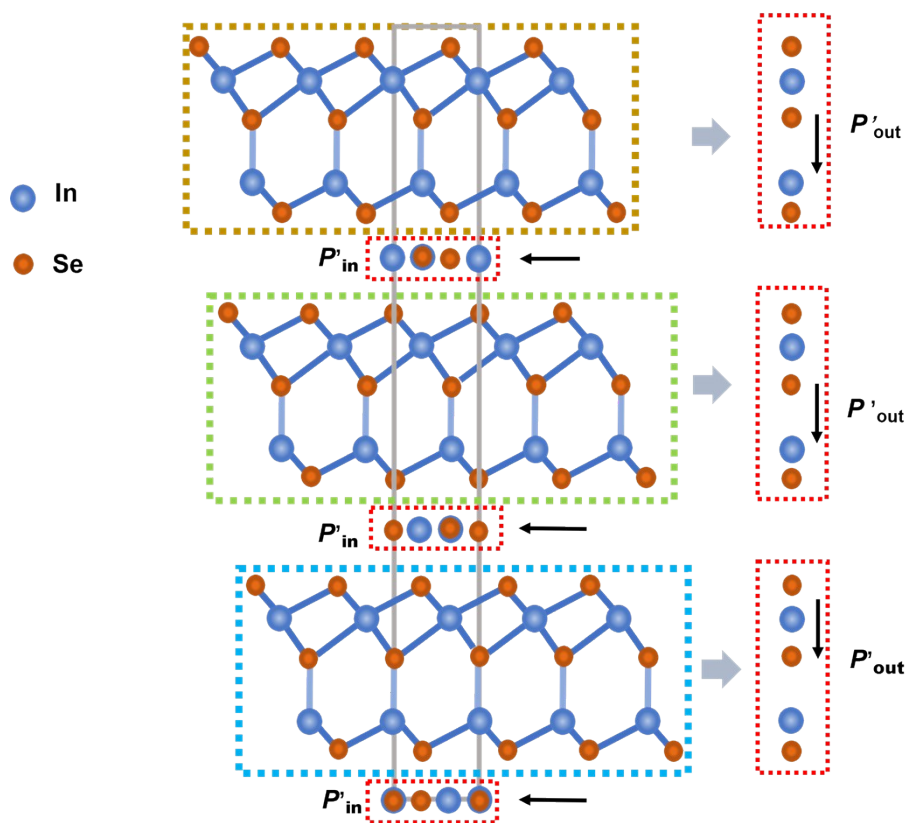

**Figure S1** | Side view of a triple-layer rhombohedral (3R)  $\alpha$ - $\text{In}_2\text{Se}_3$ . The blue and orange balls represent In and Se atoms, respectively. The black arrows represent possible spontaneous polarizations.

## Section 2: Characterization of thin graphite/ $\alpha$ - $\text{In}_2\text{Se}_3$ /thin graphite device

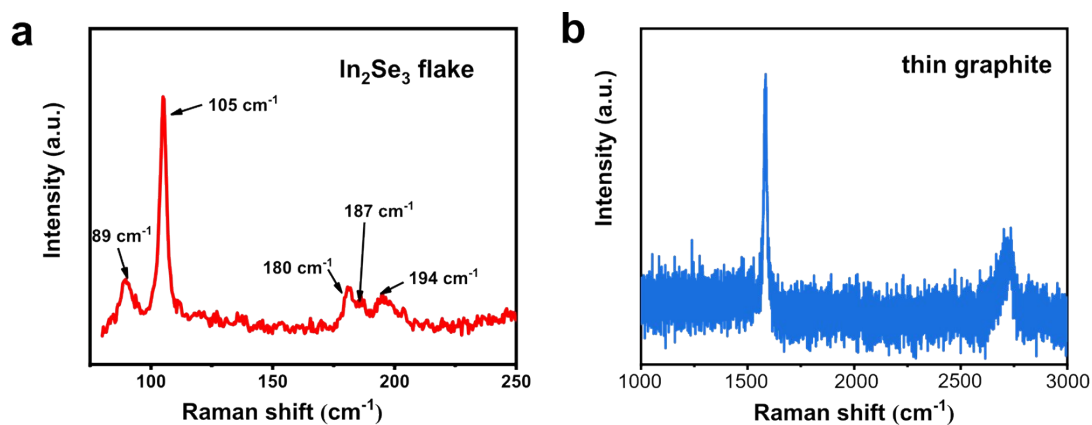

**Figure S2** | XRD pattern of a  $\alpha$ - $\text{In}_2\text{Se}_3$  flake (a) and thin graphite (b) from a thin graphite/ $\alpha$ - $\text{In}_2\text{Se}_3$ /thin graphite device.

### Section 3: Electrical transport of thin graphite/ $\alpha$ -In<sub>2</sub>Se<sub>3</sub>/thin graphite device

The  $|I|$ - $V$  curve shows a counter-clockwise loop at room temperature.

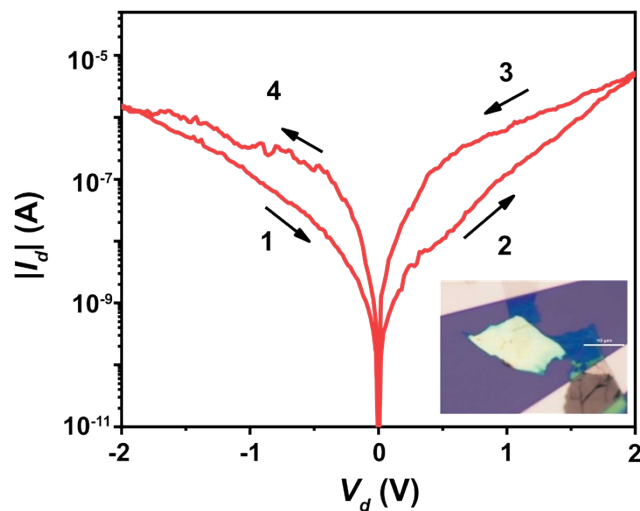

**Figure S3** | Current-voltage  $|I|$ - $V$  of a thin graphite/ $\alpha$ -In<sub>2</sub>Se<sub>3</sub>/thin graphite under current sweeping at a rate of 0.1 V/s between -3 and 3 V.

### Section 4: Optical characterization of a $\alpha$ -In<sub>2</sub>Se<sub>3</sub> flake

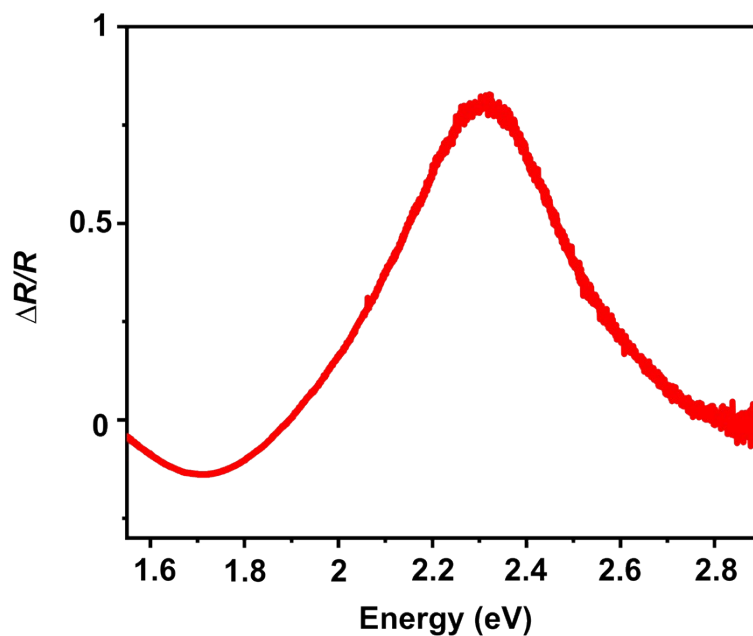

**Figure S4** | Differential reflectance of a  $\alpha$ -In<sub>2</sub>Se<sub>3</sub> flake.

## Section 5: Temperature dependence of $I_{sc}$ and $V_{oc}$ for 2D $\alpha$ - $\text{In}_2\text{Se}_3$ BPV device and its circuit Model

In order to discuss the possible mechanism underlying the temperature dependence of  $I_{sc}$  and  $V_{oc}$  under light illumination, we investigate the temperature dependence of I-V curves under dark and light conditions (illustrated in Figure S5). As the device was cooled, the total resistance containing bulk materials resistance ( $R_{\text{bulk}}$ ) and contact resistance ( $R_{\text{contact}}$ ) increased. As expected, carrier concentration in bulk semiconductors decreases at low temperatures, leading to the increase of  $R_{\text{bulk}}$ . The increase of  $R_{\text{contact}}$  also occurs with decreasing temperature for the Schottky barrier. Figure S6 displays the equivalent circuit model that may represent the device conditions during measurements of photovoltaic effect.  $I_{\text{pv}}$  is the BPV photocurrent which works as a current source.  $I_p$  and  $V_p$  are the output current and voltage of BPV device, respectively.  $I_b$  is the current within the bulk materials. The relationship of these parameters can be described by the following equation.

$$I_{\text{pv}} = I_b + I_p \quad (1)$$

$$I_b R_{\text{bulk}} = I_p R_{\text{contact}} + V_p \quad (2)$$

The open-circuit photovoltage (short-circuit photocurrent) is output voltage (current) when  $I_p = 0$  ( $V_p = 0$ ). Then,  $V_{oc}$  and  $I_{sc}$  are given by

$$V_{oc} = R_{\text{bulk}} I_{\text{pv}} \quad (3)$$

$$I_{sc} = \frac{R_{\text{bulk}}}{R_{\text{bulk}} + R_{\text{contact}}} I_{\text{pv}} \quad (4)$$

Eq. 3 indicates that  $V_{oc}$  is proportional to  $R_{\text{bulk}}$ . Suppose  $I_{\text{pv}}$  is temperature independent,  $V_{oc}$  of the device will increase with decreasing temperature. Suppose  $\frac{R_{\text{contact}}}{R_{\text{bulk}}} = 1$ , the  $I_{sc}$  is temperature-independent from Eq.4, which aligns well with the experimental results.

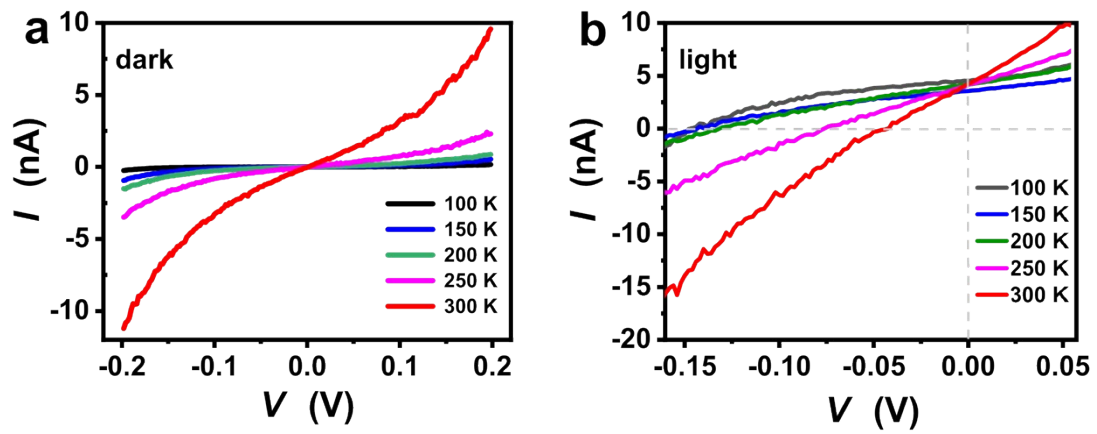

**Figure S5** | Current-voltage  $I$ - $V$  curves from a thin graphite/ $\alpha$ - $\text{In}_2\text{Se}_3$ /thin graphite device under dark (a) and light illumination (b) conditions at different temperatures.

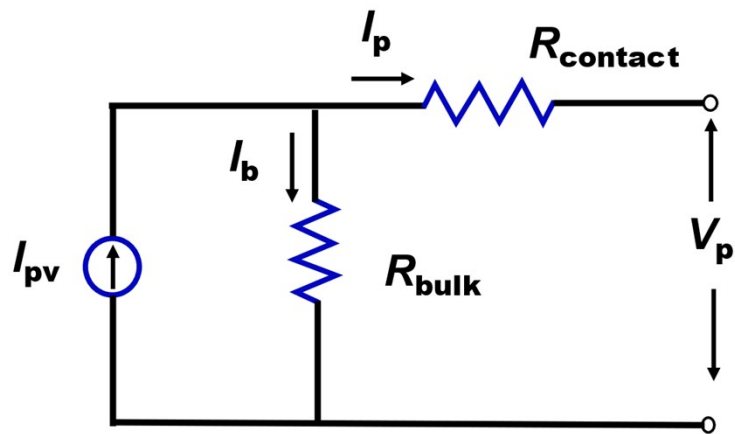

**Figure S6** | An equivalent circuit model for BPV.

## Section 6: 2D In<sub>2</sub>Se<sub>3</sub> BPV device under three different light excitations

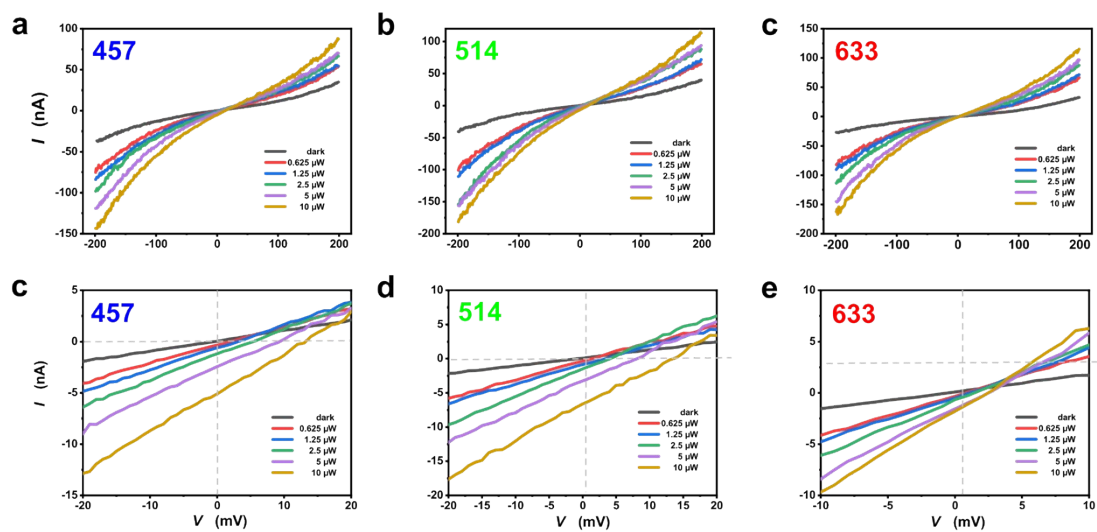

**Figure S7** |Current-voltage  $I$ - $V$  curves for thin graphite/In<sub>2</sub>Se<sub>3</sub>/thin graphite device under three light wavelengths and their corresponding zoom-in images.
